# Supplementary material for: Redundant functions of the SLC5A transporters Rumpel, Bumpel, and Kumpel in ensheathing glial cells
Source: Biol Open. 2022 Jan 18;11(1):bio059128. doi: 10.1242/bio.059128 (PMC8790523; doi:10.1242/bio.059128)
Supplement: Supplementary information [file biolopen-11-059128-s1.pdf]

|          |     |                                                                |
|----------|-----|----------------------------------------------------------------|
| Rumpel   | 1   | MHVEELRASLQS-F-----GWPDYLVFCIMLAICAVIGIYFCLQLRLESRKQKANGS      |
| mSLC5A2  | 1   | MEQHV---EAGSELGEQKVLIDNPADILVTAAYFLVIGVGLWSMFTN-----           |
| mSLC5A8  | 1   | MDASR---DIGS-F-----VVWDYVVFAGMLISAAIGIYAFAGG-----              |
| mSLC5A12 | 1   | MRV-----KN-F-----EAWDYVVFAGLFVSSGIGVFFAIKER-----               |
| Rumpel   | 52  | EEAASSAASYLVGGROMKIFPITMSLISSFTSGITLLGTPTEVYLYGAQYMYIMGSIVLM   |
| mSLC5A2  | 47  | --R-GTVGGYFLAGRSMVWVPVGCASLEASNIGSGHFVGLACTGAASGLAVAGFEWNALFV  |
| mSLC5A8  | 38  | --GQQTSKDFLMGGRSMASVPVALSLTASFMSAVTVLGTPAEVYRFGAIFSTIFVITYFFV  |
| mSLC5A12 | 34  | --KKTTSREFLVGGROMSFGPVALSLTASFMSAVTVLGTPAEVYRFGASEFLFLISYVVF   |
| Rumpel   | 112 | GFCMYFFFLPVFHEINLISTYKYLEQRYNR-SLRLEGSVMFIVASLL-WLPVIVYVPAIA   |
| mSLC5A2  | 104 | VLLLGWLFVPVYLTAGVITMPOYLKRFEGGHRIRLYLSVLSFLYIFTKISVDMFSGAVF    |
| mSLC5A8  | 96  | VVISAEVFLPVFYRLGITSTYEYLELRFNR-CIRLCGTILFIVQTIL-YTGIVYIYAPALA  |
| mSLC5A12 | 92  | VFFTSELFLPVFYRSGITSTYEYLOLRFNK-PVRYAATIIYIVQTIL-YTGIVVYIYAPALA |
| Rumpel   | 170 | FNQATGVNIHIVTPIVCVCFYTCIGGLKAVVWTDVITQTLIMFGAMALVLIKGTLDIGG    |
| mSLC5A2  | 164 | IQQALGWNIIYASVIALLGITMIYTVTGGLAALMYTDTVQTFVILAGAFIITGYAFHEVGG  |
| mSLC5A8  | 154 | LNQVTGFDLWCAVAVATGVVCTFYCTIGGLKAVVWTDVFOVGMVAGFASVIIQASITQHG   |
| mSLC5A12 | 150 | LNQVTGFNLWASVFATGIVCTFYCSLGGKAVVWTDVAFQMVMTVGLTTLVLIQGSNHVGG   |
| Rumpel   | 230 | PGVWVQKAQET-----ARLEVPNESA-----DLSERYTFYSIV-LGGVA              |
| mSLC5A2  | 224 | YSGIFDKYLGAMTSLTVSKDPSVGNISSTCYQPRPDSYHLLRDPVTGDLWPALLIGLTI    |
| mSLC5A8  | 214 | INKILSDAFNG-----GRLNFWNFD-----NPLQRHTFWTIV-IGGTF               |
| mSLC5A12 | 210 | FNNVLEKAGNG-----SRLEHVDVDFV-----DPLRRHTFWTIT-IGGTF             |
| Rumpel   | 268 | HWLKSNAISONMIQRYLSLPTLRDARIA----IWTFLAGVLAFLMICGYTGLLIYATYSQ   |
| mSLC5A2  | 284 | VSGWYWCSDQVIVQRCLAGKNLTHIKAGCILCGYTKLMPFLMVMPCMI-SRILYPDEVA    |
| mSLC5A8  | 252 | TWTTIYGVNQSQVQRYISCKSRLEHAKLS----LYVNLVGLWVILTCSIQGLALYSRYRE   |
| mSLC5A12 | 248 | TWLGvyGVNQSTIQRCISCKTEKHAKLA----LYENLGLWIIIVACAVFSGLIMYSHFKD   |
| Rumpel   | 324 | CD-----PLETKLAQRNDQLPPLVMDTLGSYPGLPGVFVAGVFSAAALSSISTGINSLS    |
| mSLC5A2  | 343 | CVVPEVCKRVCGETVGCNSIAYPRLVVKLMP--NGLRGLMIAVMLAALMSSIASIFNSSS   |
| mSLC5A8  | 308 | CD-----PWTSKKVSADQLMPYLVLDILKNYPGVPGFLVACAYSGTLSTVSSSINALA     |
| mSLC5A12 | 304 | CD-----PWTSGVISAPDQLMPYFVMEIFATMPGLPGLFVACAFSGTLSTVAASINALA    |
| Rumpel   | 378 | AVVLEDFVKTFRKSPLTEGQTAIVMRSVVVVFGLIFVALV--FAVEKLGAVLQLTITISS   |
| mSLC5A2  | 401 | TLFTMDIYTRLR-PRAGDKELLVGRLLWVFIVAVSWALPVVQAAGGQIFDYIQSVSS      |
| mSLC5A8  | 362 | AVTVEDLIKPRF-KSLSEKSLSWISQMSVLYGALCTGMA--ALASLMGALLQAALSIFG    |
| mSLC5A12 | 358 | TVTTFEDVVKSCF-PHLSDKLSTWLSKGLCILFGIMCTSM--VVASLMGSVVQAALSIFG   |
| Rumpel   | 436 | VANGPLLGIPTAGVMLPVVNSKGALLCGFSSLIWMAWCVSAQORDLVTGDLVYKRKPYST   |
| mSLC5A2  | 460 | YLAPPVSAVFLALFVPRVNEKGAFWGLVGGLLMGLARLIPEFFFG-SGS-----         |
| mSLC5A8  | 419 | MVGGPLLGLFSLGILVPFANSIGALTGLLAGFATSLWVGIGAOLYPLPERT-LPLPLET    |
| mSLC5A12 | 415 | MCGGPMLGLFTLGLVFPFVNWKALGGLLTGTLSEFWVAIGSFIIYPAPESKT-LPLPLST   |
| Rumpel   | 496 | MGCNYTFAGEPRE-----FASLALDGAII--SSVPSA-PFQLYRISYLYFTLFGALVTIV   |
| mSLC5A2  | 509 | -----CVRPSACFALFCRVHYLYFAIILFICSGI                             |
| mSLC5A8  | 478 | YGCNITHNGSDWMSTTEMPESTS--AFQIHNAERTPL-MDNWYSLSYLYFSTIGTILTLF   |
| mSLC5A12 | 474 | EHCVEL-----NITT-----TV--APQI--SSRPVL-ADTWYSLSYLYFSAVGCILGCI    |
| Rumpel   | 547 | VALVTSLLRETDLDGVDTRLTLPFVRRLL-----ERRRH---RRS-----             |
| mSLC5A2  | 538 | LTLGISLCTAPIPOKHLHR-LVF-----SLRHSKEERED-LDADE-                 |
| mSLC5A8  | 535 | VGILISLSTGG-RKQNLDPFLL-----TKQDFLSNFDV                         |
| mSLC5A12 | 518 | AGIIISFLTGKQKQKIDIPLLIRPVCNIECFWSKKYKTLWCWGVQHDRETEQDYLDGSA    |
| Rumpel   | 585 | -----KIPDSGQK-----S--SN-----KQE-----TKT                        |
| mSLC5A2  | 576 | LEGP-----APAPVQNGGQECAMEME--EVQSPAPGCLLRCLLWFCGMSKSGSGSP-PTT   |
| mSLC5A8  | 568 | FKKRNHVLNKLHPVEVGTD-----NPAFN-----HVELNFTDHSKING               |
| mSLC5A12 | 578 | WKQG-----VESGLQNGLKQ-----DT-LAQIPGYN-----PKEKSYSNSVP-EKT       |
| Rumpel   | 602 | -----                                                          |
| mSLC5A2  | 629 | EEVAATTRLEDISEDPRWARVVNINALLMMTVAVFLWGFYA                      |
| mSLC5A8  | 609 | TRL-----                                                       |
| mSLC5A12 | 617 | TYF-----                                                       |

**Fig. S1. Rumpel is predicted to be a member of the Sodium Solute symporter family (SLC5)**

BLAST detects highest homology with SLC5A8 (35.77 % identity with 90% coverage,  $p=5e-112$ ) and SLC5A12 (33.33 % identity with 92% coverage  $p=3e-110$ ). Less significant homology detected is SLC5A2 (23.21% with 67% coverage identity,  $p=3e-12$ ). Identical and similar amino acids among proteins are indicated as black and grey fills, respectively. “-” indicates missing amino acids in the respective sequence.

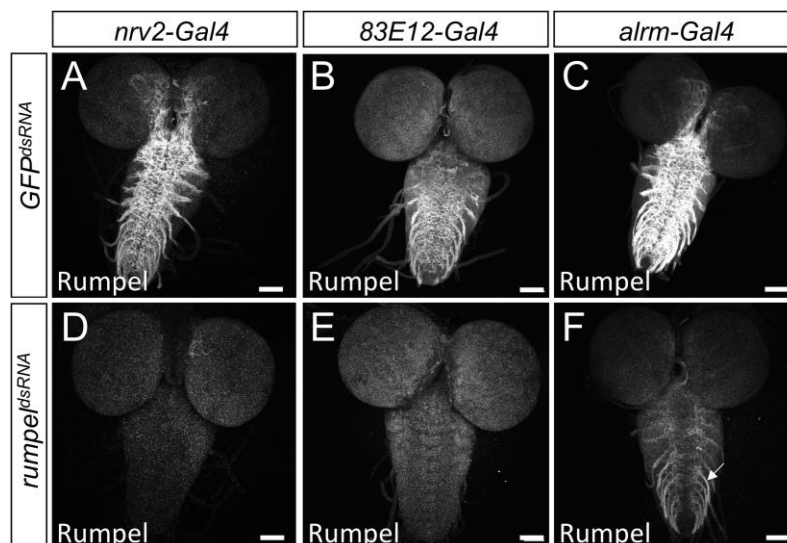

**Fig. S2. Rumpel is expressed predominantly by ensheathing glial cells.**

All specimens are stained for Rumpel (grey). (A-F) Confocal maximum projections of a third instar larval brain stained for Rumpel. (A-C) Rumpel expression is not affected by expressing dsRNA directed against *GFP* (*nrv2-Gal4>GFP<sup>dsRNABL9330</sup>*; A), in ensheathing glia (*83E12-Gal4>GFP<sup>dsRNABL9331</sup>*; B) or astrocyte-like glial cells (*alrm-Gal4>GFP<sup>dsRNABL9330</sup>*; C). (D-F) No Rumpel expression is detected upon expression of dsRNA directed against *rumpel* in cortex glia and ensheathing glia (*nrv2-Gal4>rumpel<sup>dsRNAv43922</sup>*; D). Following suppression of *rumpel* expression in ensheathing glial cells faint expression can be noted in the cortex and in the neuropil (*83E12-Gal4>rumpel<sup>dsRNAv107361</sup>*; E). Upon silencing of *rumpel* only in astrocyte-like glial cells (*alrm-Gal4>rumpel<sup>dsRNAv43922</sup>*; F) weak Rumpel expression can be detected in ensheathing glial cells (arrow) and in the cortex. Scale bars are 50  $\mu$ m.

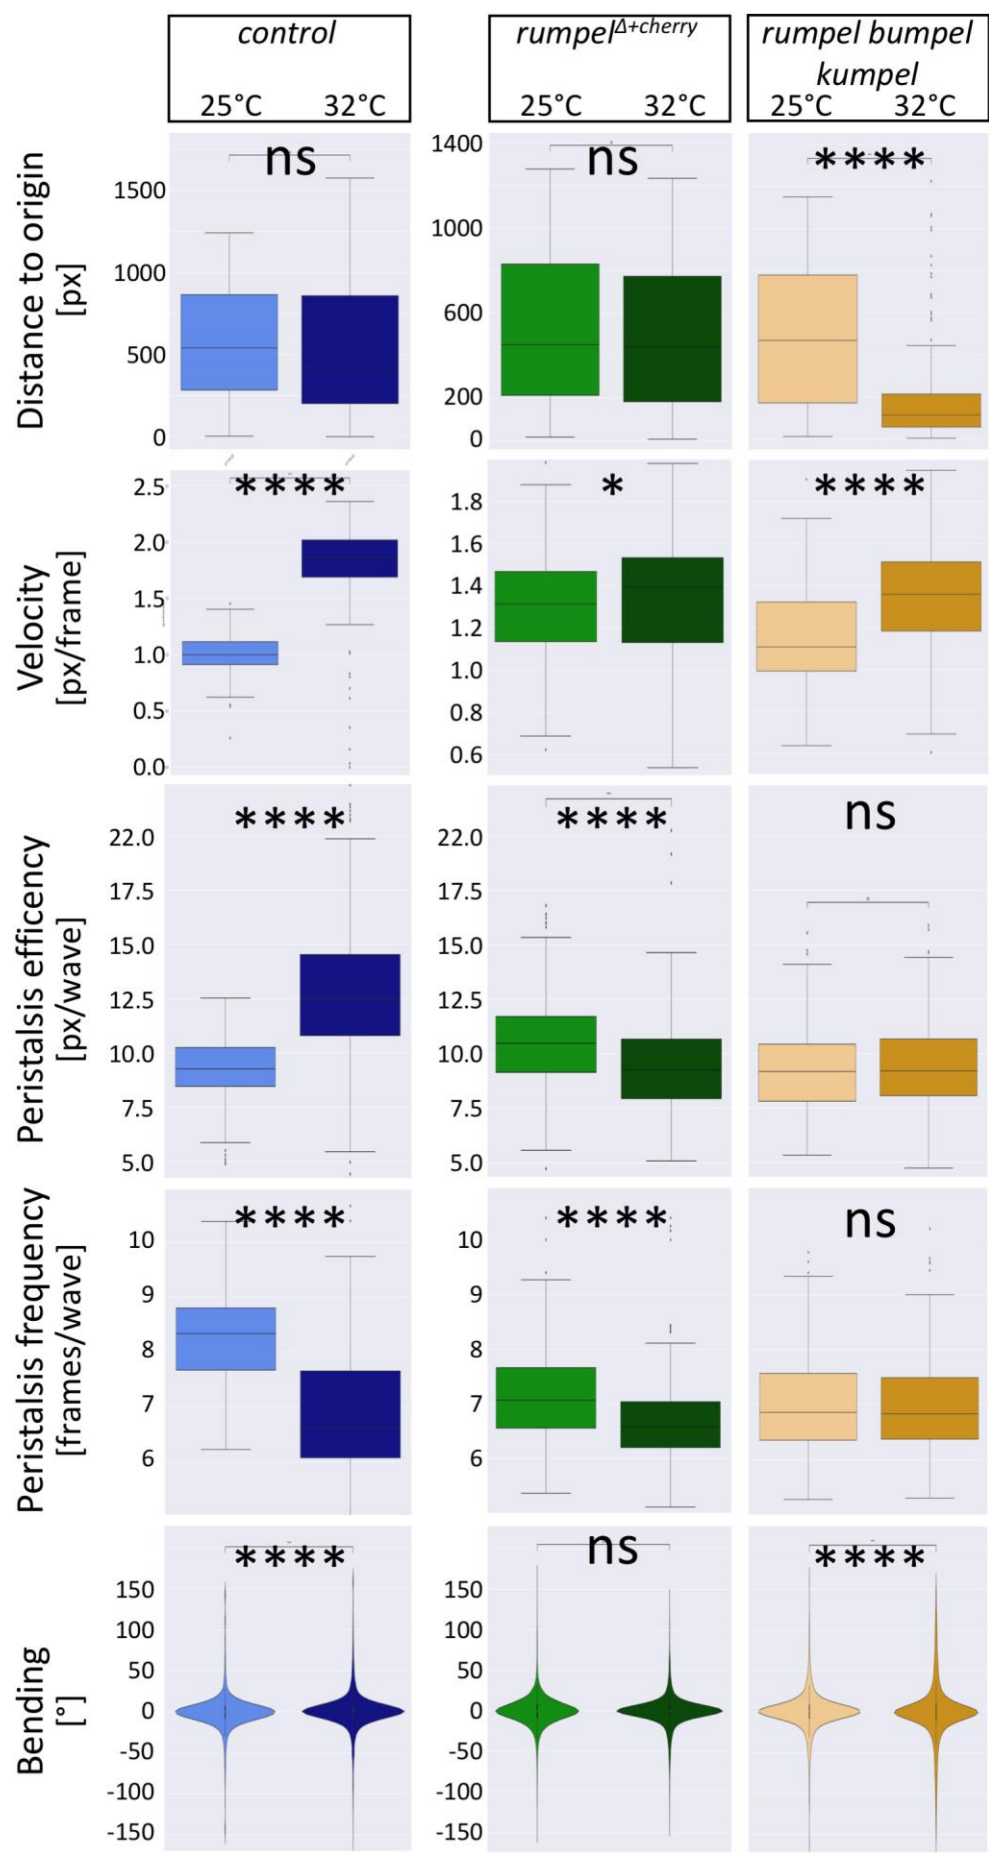

**Fig. S3. *rumpel bumpel kumpel* triple mutant show a subtle temperature dependent locomotion phenotype**

Free locomotion of 3-4 groups of 15 third instar larvae of the following genotypes

[*rumpel* <sup>$\Delta$ +cherry</sup>, *rumpel* <sup>$\Delta$ +cherry</sup> *bumpel*<sup>2</sup> *kumpel*<sup>2</sup>, *w*<sup>1118</sup>]. Although crawling velocity increases, control larvae [*w*<sup>1118</sup>] show no reduced distance to origin at 32°C compared to 25°C, which is likely due to increased bending behavior. In *rumpel* mutant larvae, no difference in distance to origin can be determined. Locomotion speed increases very slightly which is due to faster not as efficient peristaltic contractions. In *rumpel bumpel kumpel* triple mutants distance to origin is dramatically affected, despite the fact that velocity increases by 20% due to an increased bending behavior.

**A****Percent amino acid identity**

| Proteins                   | CG9657<br>Rumpel | CG6723<br>Bumpel | CG42235<br>Kumpel <sup>PA</sup> | CG42235<br>Kumpel <sup>PB</sup> | CG42235<br>Kumpel <sup>PC</sup> | CG42235<br>Kumpel <sup>PD</sup> | CG42235<br>Kumpel <sup>PE</sup> |
|----------------------------|------------------|------------------|---------------------------------|---------------------------------|---------------------------------|---------------------------------|---------------------------------|
| <b>Rumpel</b>              | -                | 51.61%           | 47.94%                          | 47.94%                          | 46.40%                          | 43.04%                          | 46.54%                          |
| <b>Bumpel</b>              | 52.55%           | -                | 48.03%                          | 46.68%                          | 43.26%                          | 43.43%                          | 43.64%                          |
| <b>Kumpel<sup>PA</sup></b> | 49.48%           | 48.03%           | -                               | 85.88%                          | 63.83%                          | 62.30%                          | 64.01%                          |
| <b>Kumpel<sup>PB</sup></b> | 49.14%           | 46.68%           | 85.88%                          | -                               | 64.58%                          | 63.15%                          | 64.77%                          |
| <b>Kumpel<sup>PC</sup></b> | 46.98%           | 43.26%           | 63.83%                          | 64.58%                          | -                               | 62.70%                          | 67.69                           |
| <b>Kumpel<sup>PD</sup></b> | 44.41%           | 43.43%           | 62.59%                          | 63.15%                          | 62.70%                          | -                               | 65.09%                          |
| <b>Kumpel<sup>PE</sup></b> | 46.99%           | 43.57%           | 64.01%                          | 64.77%                          | 67.69%                          | 64.81%                          | -                               |

**B****Stage 13-16***rumpel***C****Stage 13-16***bumpel***D****Stage 13-16***rumpel***E****Stage 13-16***bumpel***Fig. S4. Amino acid sequence comparison of Rumpel, Bumpel and Kumpel**

(A) Pairwise amino acid sequence comparison between Rumpel, Bumpel and Kumpel using BLAST (ALTSCHUL et al., 1990). The homology of the different protein forms is indicated and ranges from 43% to 85% identity. The five different Kumpel isoforms are more similar on

amino acid level to each other (62-85%) than compared to Rumpel and Bumpel. (B-E) RNA *in situ* hybridizations of *Drosophila* embryos showing expression of *rumpel* (B,D) and *bumpel* (C,E) expression at embryonic stage 16 (images from BDGP). Both genes are expressed by the longitudinal glial cells, comprising ensheathing glia and astrocyte-like glia.

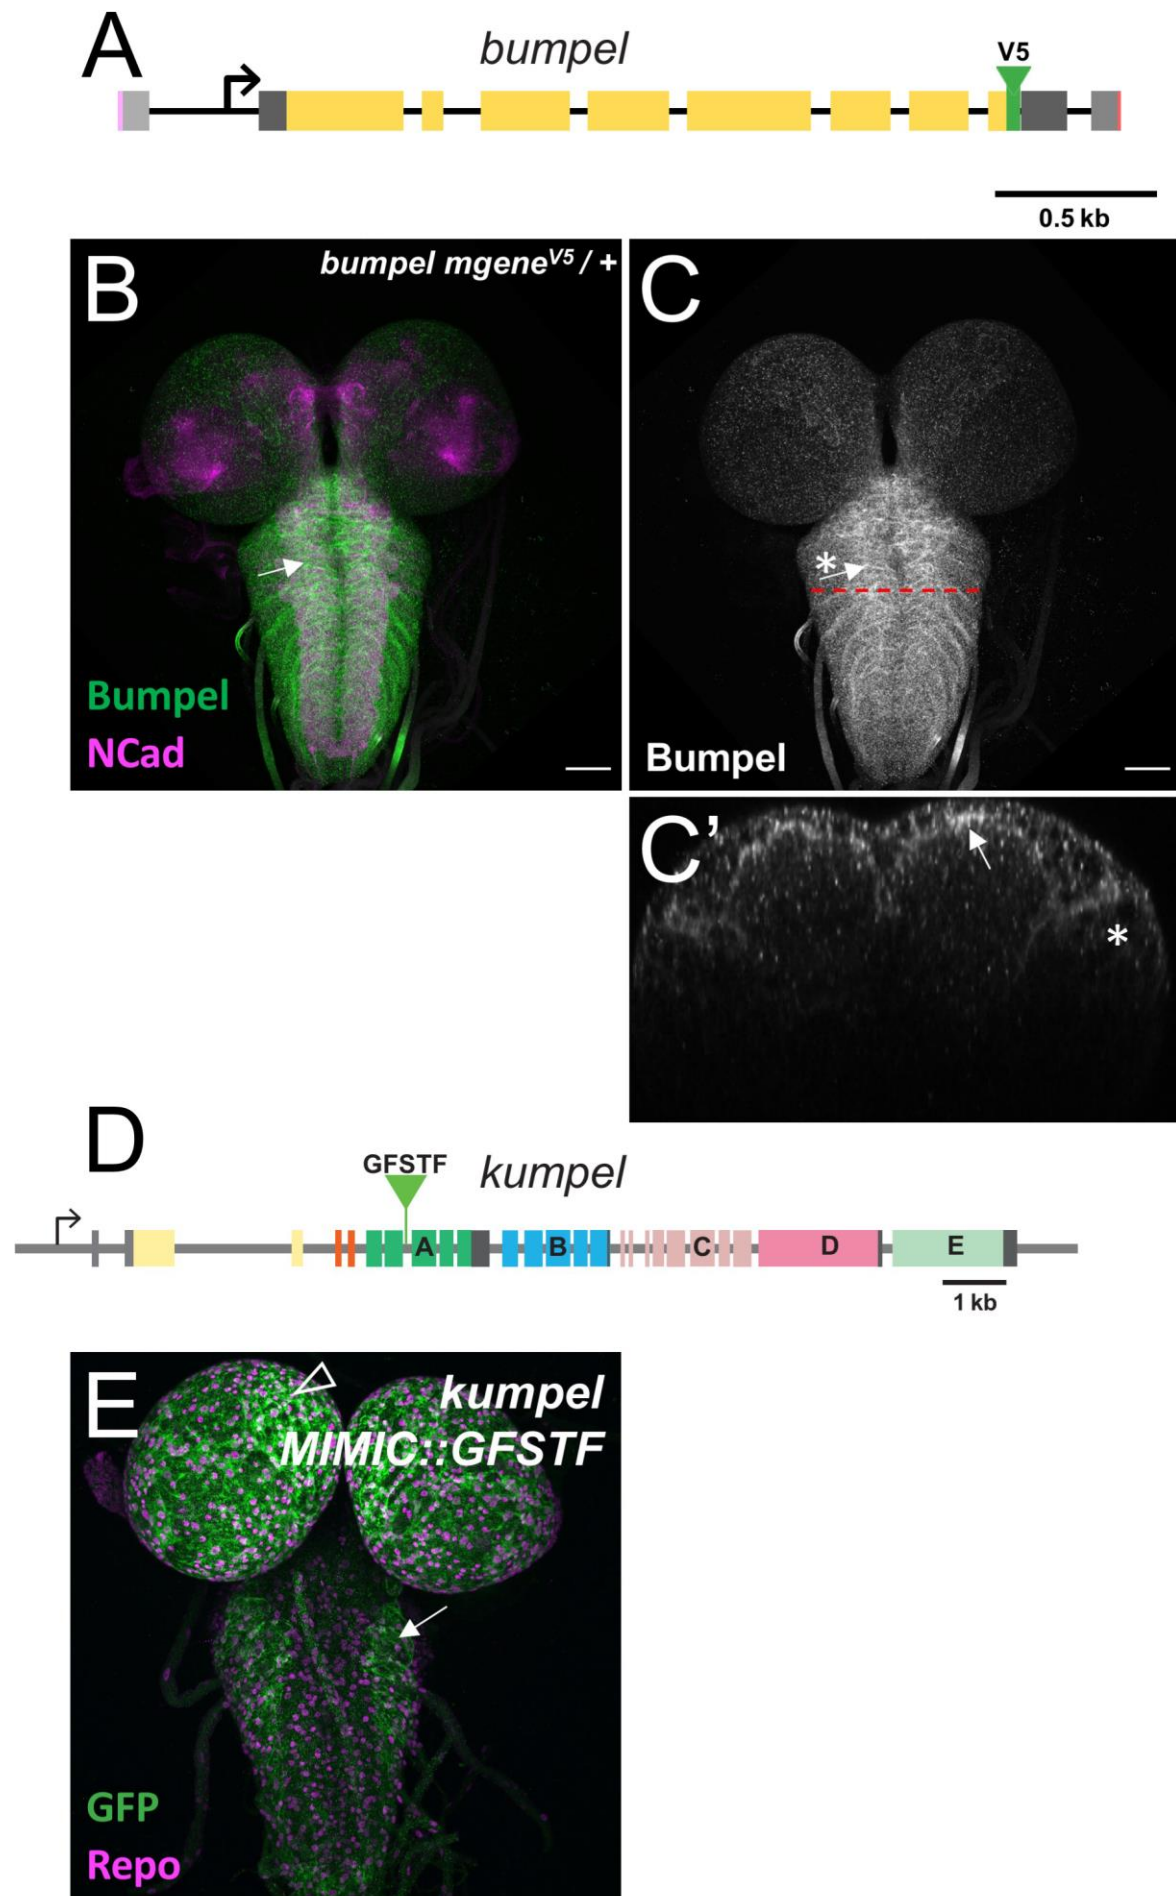

**Fig. S5. *bumpel*<sup>mgeneV5</sup> and *kumpel*<sup>MiMIC::GFSTF</sup> show expression in CNS glial cells.**

All specimens are stained for Bumpel (V5; green/grey), Kumpel (GFP; green), Repo protein localization to define glial nuclei (magenta).

(A) Schematic representation of the *bumpel* minigene carrying 500 bp upstream sequence. A V5-tag was inserted at the C-terminus just before the stop-codon. (B-C) Following anti-V5 staining, Bumpel::V5 localization (green, grey) is predominantly detected in the ensheathing (arrow) and cortex glial cells (asterisk). Anti-N-Cadherin staining is used to visualize the neuropil (magenta). The red dotted line indicates the position of orthogonal plane shown in (C'). (D) Schematic representation of the MiMIC<sup>GFSTF</sup> insertion into the *kumpel* gene. (E) Kumpel protein can be detected in cortex of the brain lobes (arrowhead) and the ventral nerve cord (arrow) of the larval CNS.
